# Supplementary material
Source: PubMed Central journal article supplement (PMC6816092)
Supplement: supp_RA119.010406_154849_1_supp_385025_pw3jk1.pdf [file supp_RA119.010406_154849_1_supp_385025_pw3jk1.pdf]

# An extended bacterial reductive pyrimidine degradation pathway that enables nitrogen release from $\beta$ -alanine

Jinyu Yin<sup>1†</sup>, Yifeng Wei<sup>2†</sup>, Dazhi Liu<sup>1</sup>, Yiling Hu<sup>1</sup>, Qiang Lu<sup>1</sup>, Ee Lui Ang<sup>2</sup>, Huimin Zhao<sup>2,3\*</sup>, Yan Zhang<sup>1\*</sup>

## List of materials in Supporting Information

Supplementary methods

Supporting Figures (Fig. S1-11)

Supporting Tables (Table S1-3)

## SUPPLEMENTARY METHODS

### Preparation of defined medium for *B. smithii*

To prepare defined medium, 9 g Na<sub>2</sub>HPO<sub>4</sub> · 12H<sub>2</sub>O, 1.5 g KH<sub>2</sub>PO<sub>4</sub>, 0.01 g MnSO<sub>4</sub> · H<sub>2</sub>O, 0.2 g MgSO<sub>4</sub> · 7H<sub>2</sub>O, 0.01 g CaCl<sub>2</sub> · 2H<sub>2</sub>O, 5 mg Na<sub>2</sub> EDTA · 2H<sub>2</sub>O, 1.5 mg CoCl<sub>2</sub> · 6H<sub>2</sub>O, 1 mg ZnCl<sub>2</sub>, 0.1 mg H<sub>3</sub>BO<sub>3</sub>, 0.2 mg CuCl<sub>2</sub> · 2H<sub>2</sub>O, 0.1 mg Na<sub>2</sub>MoO<sub>4</sub> · 2H<sub>2</sub>O, 0.2 mg NiSO<sub>4</sub> · 6H<sub>2</sub>O, 1 mg FeSO<sub>4</sub> · 7H<sub>2</sub>O, 0.2 mg Na<sub>2</sub>SeO<sub>3</sub>, 0.4 mg Na<sub>2</sub>WO<sub>4</sub> · 2H<sub>2</sub>O, 20 µg biotin, 20 µg folic acid, 100 µg pyridoxine-HCl, 50 µg thiamine-HCl, 50 µg riboflavin, 50 µg nicotinic acid, 50 µg D-Ca-pantothenate, 1 µg vitamin B12, 50 µg p-aminobenzoic acid, 50 µg lipoic acid, 17.5 µg inositol, 3.75 µg choline, 1.5 g Na-pyruvate and 20 g glucose were dissolved in 1 L distilled water, NH<sub>4</sub>Cl, uracil, uridine or cytidine was added as the sole nitrogen source, adjusted to a molar equivalent of 20 mM nitrogen. The medium was then filtered through a sterile 0.22 µm filter.

### Purification and activity assay of *Bs*ALD

The gene encoding *Bs*ALD that was used as a coupling enzyme for spectrophotometric assays was amplified by PCR from *Bacillus subtilis* genomic DNA, using the primer pair 3F/3R (Table S1). The PCR product was inserted into customized expression vectors (encoding an N-terminal MGSSHHHHHSQSGSG tag) by Gibson assembly to form pET28-*Bs*ALD. The recombinant plasmid was confirmed by DNA sequencing through Tsingke (Beijing, China), and was transformed into BL21 (DE3) *E. coli* cells. Cell culture and protein induction were performed exactly the same as described for PydD/E. Cell paste from 2 L culture was resuspended in 100 mL lysis buffer containing 40 mM HEPES, pH 7.4, 500 mM NaCl. Cells were then lysed by French Press (Panda plus, Niro Soavi Co., Italy). After cell debris removal by centrifugation at 20,000×g, the cell lysate was filtered and loaded on a 10 mL Ni HisTrap HP column and washed with 4 CV of lysis buffer. The column was then eluted with a linear gradient from 0-300 mM imidazole by mixing lysis buffer and elution buffer containing 40 mM HEPES, pH 7.4, 500 mM NaCl, 500 mM imidazole. The *Bs*ALD protein was eluted roughly at 100 mM imidazole. The fractions containing *Bs*ALD were pooled together and dialyzed against 4 L dialysis buffer containing 40 mM HEPES, pH 7.0, 100 mM NaCl overnight. The typical yield of *Bs*ALD from 2 L cell culture was 190 mg. The protein was purified to high homogeneity, analysed by 12% SDS-PAGE. The specific activity of purified *Bs*ALD was measured under the PydD coupling assay conditions. A 200 µL of reaction mixture containing 100 mM HEPES buffer, pH 8.0, 5 mM NAD<sup>+</sup>, 20 mM L-alanine, and 200 ng *Bs*ALD was continuously monitored for the change of A<sub>340</sub> using a plate reader (Tecan M200).

**Table S1.** Oligonucleotides used for cloning and sequencing

| Oligos | Target       | Sequence (5' to 3')                                            | Application                                             |
|--------|--------------|----------------------------------------------------------------|---------------------------------------------------------|
| 1F     | <i>pydD</i>  | (5'-TGAAAACCTGTACTTCCAATCCAATAGTG<br>ATTATTTATCGATAAAAGAAC-3') | Construct HT-PydD                                       |
| 1R     | <i>pydD</i>  | (5'-TTCGGATCCGTTATCCACTTCCAATTTACA<br>CAGATAGCGTTTCTT-3')      | Construct HT-PydD                                       |
| 2F     | <i>pydE</i>  | (5'-TGAAAACCTGTACTTCCAATCCAATGTGG<br>AAGGATTTTATTACGAAC-3')    | Construct HT-PydE                                       |
| 2R     | <i>pydE</i>  | (5'-TTCGGATCCGTTATCCACTTCCAATTTATG<br>AAACTGCTGAAGATTTTG-3')   | Construct HT-PydE                                       |
| 3F     | <i>BsALD</i> | (5'-CCAGAGCGGATCAGGAATGATCATAGGG<br>GTTCTAAAGAG-3')            | Construct<br>pET-28a(+)-His <sub>6</sub> - <i>BsALD</i> |
| 3R     | <i>BsALD</i> | (5'-CCAATTGAGATCTGCCATATGTTAAGCAC<br>CGCCACAGATGATTC-3')       | Construct<br>pET-28a(+)-His <sub>6</sub> - <i>BsALD</i> |

**Table S2.** Growth of *Bacillus smithii* in defined media containing pyrimidine as the sole nitrogen source

| Bacterial strains<br>Nitrogen source | <i>Bacillus smithii</i> |               |
|--------------------------------------|-------------------------|---------------|
|                                      | Growth                  | 3-HP secreted |
| none                                 | -                       | -             |
| NH <sub>4</sub> Cl                   | +                       | -             |
| uracil                               | +                       | +             |
| uridine                              | +                       | +             |
| cytidine                             | +                       | -             |

**Table S3.** A list of bacteria with Pyd gene clusters containing PydABCD (and PydE)

| Phylum     | Class      | Organism                                                                                   | PydA       | PydB       | PydC                      | PydD       | PydE       |
|------------|------------|--------------------------------------------------------------------------------------------|------------|------------|---------------------------|------------|------------|
| Firmicutes | Bacilli    | <i>A. pallidus</i>                                                                         | A0A223E4N8 | A0A223E4K1 | A0A223E4I5                | A0A223E4L3 | A0A223E4H9 |
| Firmicutes | Bacilli    | <i>B. asahii</i>                                                                           | A0A398B2G6 | A0A398B195 | A0A398B1I7                | A0A398B0T7 | A0A398B3Z0 |
| Firmicutes | Bacilli    | <i>B. coagulans</i>                                                                        | A0A0C5CFU2 | A0A0C5CCT3 | A0A0C5C847                | A0A0C5CFU6 | A0A0C5CCT7 |
| Firmicutes | Bacilli    | <i>B. coagulans</i> 36D1                                                                   | G2TR85     | G2TR84     | G2TR88                    | G2TR90     | G2TR89     |
| Firmicutes | Bacilli    | <i>B. smithii</i>                                                                          | A0A0H4P1N5 | A0A0H4P5H6 | A0A0H4PIJ5,<br>A0A0H4PIK3 | A0A0H4P1N9 | A0A0H4P5H9 |
| Firmicutes | Bacilli    | <i>L. massiliensis</i> 4400831 = CIP<br>108448 = CCUG 49529                                | A0A0A3JZ82 | A0A0A3J937 | A0A0A3J5F8                | A0A0A3JZ59 | A0A0A3J5T1 |
| Firmicutes | Bacilli    | <i>R. sp.</i> TYF005                                                                       | A0A3N6BSY1 | A0A3N5ZTC8 | A0A3N6ACG0                | A0A3N5ZU34 | A0A3N5ZTD4 |
| Firmicutes | Clostridia | <i>C. algidixylanolyticum</i>                                                              | A0A419SSA0 | A0A419SSE2 | A0A419SSC9                | A0A419SS74 | A0A419SSG2 |
| Firmicutes | Clostridia | [ <i>Eubacterium</i> ] <i>cellulosolvens</i> 6                                             | I5AWA1     | I5AWA0     | I5AWA2                    | I5AW94     | I5AW95     |
| Firmicutes | Clostridia | <i>A. ruminis</i> DSM 5522                                                                 | A0A1I0ZLN2 | A0A1I0ZM62 | A0A1I0ZLT7                | A0A1I0ZLD1 | A0A1I0ZLU6 |
| Firmicutes | Clostridia | <i>A. ruminis</i>                                                                          | A0A2G3E590 | A0A2G3E5C8 | A0A2G3E514                | A0A2G3E5F6 | A0A2G3E5D3 |
| Firmicutes | Clostridia | <i>A. jejuensis</i> DSM 15929                                                              | A0A1M7AUR3 | A0A1M7AV09 | A0A1M7AV22                | A0A1M7AVE2 | A0A1M7AVG0 |
| Firmicutes | Clostridia | <i>A. xylanovorans</i> DSM 12503                                                           | A0A1M7YA70 | A0A1M7Y9Z9 | A0A1M7YA28                | A0A1M7YA39 | A0A1M7YA15 |
| Firmicutes | Clostridia | <i>A. mobilis</i> DSM 15930                                                                | A0A1M7F2L7 | A0A1M7F211 | A0A1M7F1X4                | A0A1M7F341 | A0A1M7F323 |
| Firmicutes | Clostridia | <i>A. multivorans</i>                                                                      | A0A239HS77 | A0A239HRL2 | A0A239HS20                | A0A239HRK1 |            |
| Firmicutes | Clostridia | <i>B. sp.</i>                                                                              | A0A350RPH5 | A0A350RPH6 | A0A350RPH4                | A0A350RPI2 | A0A350RPI1 |
| Firmicutes | Clostridia | <i>B. sp.</i>                                                                              | A0A3C0J5R4 | A0A3C0J5N5 | A0A3C0J6I7                | A0A3C0J5L0 | A0A3C0J5S7 |
| Firmicutes | Clostridia | <i>C. lentocellum</i> (ATCC<br>49066/DSM 5427/NCIMB<br>11756/RHM5)                         | F2JM71     | F2JM70     | F2JM72                    | F2JM64     | F2JM65     |
| Firmicutes | Clostridia | <i>C. bacterium</i> BRH_c25                                                                | A0A101W7G8 | A0A101W8C9 | A0A101W6X6,<br>A0A101W7F7 | A0A101W790 |            |
| Firmicutes | Clostridia | <i>C. bacterium</i> GWB2_37_7                                                              | A0A1F8U3L1 | A0A1F8U221 | A0A1F8U2E7                | A0A1F8U2P4 |            |
| Firmicutes | Clostridia | <i>C. acidisoli</i> DSM 12555                                                              | A0A1W1XNV9 | A0A1W1XMX4 | A0A1W1XNU6                | A0A1W1XMP8 | A0A1W1XMW9 |
| Firmicutes | Clostridia | <i>C. autoethanogenum</i>                                                                  | A0A3M0T022 | A0A3M0SPC2 | A0A3M0SPS6                | A0A3M0SRE8 | A0A3M0SQY0 |
| Firmicutes | Clostridia | <i>C. autoethanogenum</i> DSM<br>10061                                                     | U5RVY0     | U5RSI1     | U5RWH7                    | U5RVY5     | U5RSM4     |
| Firmicutes | Clostridia | <i>C. beijerinckii</i> ( <i>Clostridium</i> MP)                                            | A0A1S8P8F7 | A0A1S8QYR0 | A0A1S8QYE7                | A0A1S8P8M0 | A0A1S8P8K9 |
| Firmicutes | Clostridia | <i>C. beijerinckii</i> ( <i>Clostridium</i> MP)                                            | A0A1S8P7U8 | A0A0B5QKE4 | A0A1S8P7T5                | A0A1S8P7T0 | A0A1S8P839 |
| Firmicutes | Clostridia | <i>C. beijerinckii</i> ( <i>Clostridium</i> MP)                                            | A0A1S8PFH4 | A0A1S8Q8J0 | A0A1S8Q8M2                | A0A1S8PFN4 | A0A1S8Q8G9 |
| Firmicutes | Clostridia | <i>C. beijerinckii</i> ( <i>Clostridium</i> MP)                                            | A0A0B5QL98 | A0A0B5QKE4 | A0A0B5QPE4                | A0A0B5QCQ0 | A0A0B5QKD8 |
| Firmicutes | Clostridia | <i>C. beijerinckii</i> ( <i>Clostridium</i> MP)                                            | A0A1W7LQQ8 | A0A0B5QKE4 | A0A1W7LM15                | A0A1W7LTG9 | A0A1W7LM10 |
| Firmicutes | Clostridia | <i>C. beijerinckii</i> ( <i>Clostridium</i> MP)                                            | A0A1S9N1C6 | A0A1S9N117 | A0A1S9N0Z7                | A0A1S8QRI1 | A0A1S9N128 |
| Firmicutes | Clostridia | <i>C. beijerinckii</i> ( <i>Clostridium</i> MP)                                            | A0A1B9BKP6 | A0A0B5QKE4 | A0A1B9BKS4                | A0A1B9BQK6 | A0A1B9BKM4 |
| Firmicutes | Clostridia | <i>C. beijerinckii</i> ( <i>Clostridium</i> MP)                                            | A0A1S8S4F4 | A0A1S8S4S5 | A0A1S8S4M0                | A0A1S8S4D7 | A0A1S8S4F1 |
| Firmicutes | Clostridia | <i>C. beijerinckii</i><br>(ATCC 51743/NCIMB 8052)<br>( <i>Clostridium acetobutylicum</i> ) | A6LUT3     | A6LUT2     | A6LUT4                    | A6LUS6     | A6LUS7     |
| Firmicutes | Clostridia | <i>C. beijerinckii</i> NRRL B-598                                                          | A0A0K2MFY1 | A0A0K2MFE3 | A0A0K2MFP6                | A0A0K2ML45 | A0A0K2MFF1 |
| Firmicutes | Clostridia | <i>C. carnis</i>                                                                           | A0A3P6K848 | A0A3P6KMN4 | A0A3P6K857                | A0A3P6JKC2 | A0A3P6JH88 |
| Firmicutes | Clostridia | <i>C. chromiireducens</i>                                                                  | A0A399ILH0 | A0A399IL93 | A0A399ISF6                | A0A399IL77 | A0A399INK5 |
| Firmicutes | Clostridia | <i>C. chromiireducens</i>                                                                  | A0A1V4IHK3 | A0A1V4IH40 | A0A1V4IGU3                | A0A1V4IGM3 | A0A1V4IGU8 |
| Firmicutes | Clostridia | <i>C. coskatii</i>                                                                         | A0A166SRP5 | A0A162L8S6 | A0A166SRS4                | A0A162JAQ4 | A0A162LF43 |
| Firmicutes | Clostridia | <i>C. diolis</i>                                                                           | A0A2P8RIF7 | A0A2P8RII9 | A0A2P8RIFO                | A0A2P8RIP8 | A0A2P8RIM7 |
| Firmicutes | Clostridia | <i>C. homopropionicum</i> DSM<br>5847                                                      | A0A0L6ZBA6 | A0A0L6ZAV4 | A0A0L6ZAU7,<br>A0A0L6ZAU0 | A0A0L6ZAT8 | A0A0L6ZB99 |
| Firmicutes | Clostridia | <i>C. hungatei</i>                                                                         | A0A1V4SIN8 | A0A1V4SGW4 | A0A1V4SGV3,<br>A0A1V4SGX9 | A0A1V4SI22 | A0A1V4SH37 |
| Firmicutes | Clostridia | <i>C. intestinale</i> DSM 6191                                                             | A0A1M6AWV5 | A0A1M6AWB9 | A0A1M6AW27                | A0A1M6AXG3 | A0A1M6AXC4 |
| Firmicutes | Clostridia | <i>C. intestinale</i> URNW                                                                 | U2Q2J9     | U2NPH7     | U2NP64                    | U2NM35     | U2NPU1     |
| Firmicutes | Clostridia | <i>C. kluyveri</i>                                                                         | A0A1L5F9I3 | A0A1L5FA26 | A0A1L5FE54                | A0A1L5F9M1 | A0A1L5F9N7 |

|            |            |                                                                  |            |            |                           |            |            |
|------------|------------|------------------------------------------------------------------|------------|------------|---------------------------|------------|------------|
| Firmicutes | Clostridia | <i>C. kluveri</i> (ATCC 8527/DSM 555/NCIMB 10680)                | A5MZW5     | A5MZW7     | A5MZW9                    | A5MZX0     | A5MZX1     |
| Firmicutes | Clostridia | <i>C. kluveri</i> (NBRC 12016)                                   | B9E3U1     | B9E3U3     | B9E3U5                    | B9E3U6     | B9E3U7     |
| Firmicutes | Clostridia | <i>C. ljungdahlii</i> (ATCC 55383/DSM 13528/PETC)                | D8GT29     | D8GT31     | D8GT33                    | D8GT34     | D8GT35     |
| Firmicutes | Clostridia | <i>C. luticellarii</i>                                           | A0A2T0BSD2 | A0A2T0BSC0 | A0A2T0BSH3                | A0A2T0BSA8 | A0A2T0BSB5 |
| Firmicutes | Clostridia | <i>C. neonatale</i>                                              | A0A2A7MJ06 | A0A2A7MJQ1 | A0A2A7MJ07                | A0A2A7MIRO | A0A2A7MIN4 |
| Firmicutes | Clostridia | <i>C. pasteurianum</i>                                           | A0A1D9N1A6 | A0A1D9N1C4 | A0A1D9N1Q6                | A0A1D9N156 | A0A1D9N1M4 |
| Firmicutes | Clostridia | <i>C. pasteurianum</i> BC1                                       | R4K0I3     | R4JZ11     | R4K6E3                    | R4K0H9     | R4JZ15     |
| Firmicutes | Clostridia | <i>C. pasteurianum</i> (DSM 525/ATCC 6013)                       | A0A0H3J858 | A0A0H3J065 | A0A0H3J059                | A0A0H3J856 | A0A0H3J1E7 |
| Firmicutes | Clostridia | <i>C. puniceum</i>                                               | A0A1S8TH67 | A0A1S8THH5 | A0A1S8THC1                | A0A1S8TH62 | A0A1S8THH1 |
| Firmicutes | Clostridia | <i>C. ragsdalei</i> P11                                          | A0A1A6B1G0 | A0A1A6B1N9 | A0A1A6B1N1                | A0A1A6B1G5 | A0A1A6B1M2 |
| Firmicutes | Clostridia | <i>C. saccharoperbutylacetonicum</i> N1-4(HMT)                   | M1MT42     | M1N365     | M1LXA7                    | M1MNV2     | M1N370     |
| Firmicutes | Clostridia | <i>C. scatologenes</i>                                           | A0A0E3K0S0 | A0A0E3GQW2 | A0A0E3JYU1                | A0A0E3M674 | A0A0E3K0S2 |
| Firmicutes | Clostridia | <i>C. sp.</i> (SY8519)                                           | F7V837     | F7V838     | F7V836                    | F7V843     | F7V834     |
| Firmicutes | Clostridia | <i>C. sp.</i> BL-8                                               | A0A1S8TS36 | A0A1S8TRW3 | A0A1S8TT21                | A0A1S8TRZ1 | A0A1S8TRW7 |
| Firmicutes | Clostridia | <i>C. sp.</i> DL-VIII                                            | G7M3S7     | G7M3S8     | G7M3S6                    | G7M3T4     | G7M3T3     |
| Firmicutes | Clostridia | <i>C. sp.</i> Maddingley MBC34-26                                | K6U657     | K6U511     | K6T9U8                    | K6TV6      | K6U508     |
| Firmicutes | Clostridia | <i>C. tyrobutyricum</i> DIVETGP                                  | W6N4J3     | W6N3Q1     | W6N4Z4                    | W6N4J7     | W6NGD8     |
| Firmicutes | Clostridia | <i>C. vincentii</i>                                              | A0A2T0BKU7 | A0A2T0BKR0 | A0A2T0BKS2                | A0A2T0BKS3 | A0A2T0BKY4 |
| Firmicutes | Clostridia | <i>D. sp.</i> OT                                                 | G2FWP0     | G2FWP1     | G2FWP2,<br>G2FWP3         | G2FWP5     | G2FWP4     |
| Firmicutes | Clostridia | <i>E. harbinense</i>                                             | A0A386XE34 | A0A386XPY5 | A0A386XCP6                | A0A386XIZ9 | A0A386XLW0 |
| Firmicutes | Clostridia | <i>E. harbinense</i> (DSM 18485/JCM 12961/CGMCC 1.5033/YUAN-3)   | E6U518     | E6U516     | E6U520                    | E6U519     | E6U509     |
| Firmicutes | Clostridia | <i>E. oxidoreducens</i>                                          | A0A1G6CKW4 | A0A1G6CKX4 | A0A1G6CKW1                | A0A1G6CL41 | A0A1G6CL40 |
| Firmicutes | Clostridia | <i>H. salsuginis</i>                                             | A0A1I4HJJ3 | A0A1I4HH73 | A0A1I4HIL3                | A0A1I4HJD4 | A0A1I4HJZ2 |
| Firmicutes | Clostridia | <i>L. bacterium</i>                                              | A0A3B9B4S5 | A0A3B9B4Q5 | A0A3B9B4U5                | A0A3B9B4Q7 |            |
| Firmicutes | Clostridia | <i>L. bacterium</i> KHCPX20                                      | A0A1H2QXM1 | A0A1H2QXA4 | A0A1H2QXK8                | A0A1H2QWR9 | A0A1H2QX07 |
| Firmicutes | Clostridia | <i>L. bacterium</i> NLAE-zl-G231                                 | A0A1I2XR06 | A0A1I2XR46 | A0A1I2XRG4                | A0A1I2XTD4 | A0A1I2XSB6 |
| Firmicutes | Clostridia | <i>L. bacterium</i> TF09-5                                       | A0A3A6HG77 | A0A3A6HNT8 | A0A3A6HQP2                | A0A3A6HG24 | A0A3A6HN59 |
| Firmicutes | Clostridia | <i>N. peptidivorans</i>                                          | A0A1H9ZZV8 | A0A1I0A0Z5 | A0A1H9ZZH7                | A0A1I0A155 |            |
| Firmicutes | Clostridia | <i>O. metallireducens</i>                                        | A0A285I060 | A0A285I037 | A0A285I027                | A0A285I016 | A0A285I2P4 |
| Firmicutes | Clostridia | <i>P. cinnamivorans</i> DSM 12816                                | A0A1W2AUS7 | A0A1W2AVT6 | A0A1W2AVN4,<br>A0A1W2AUP8 | A0A1W2AUN2 | A0A1W2AUK9 |
| Firmicutes | Clostridia | <i>R. sp.</i> 499                                                | A0A1Q9JEC1 | A0A1Q9JEK9 | A0A1Q9JED0                | A0A1Q9JEH1 | A0A1Q9JEA4 |
| Firmicutes | Clostridia | <i>R. bacterium</i>                                              | A0A3D5NG72 | A0A3D5NFB9 | A0A3D5NGG0                | A0A3D5NFF9 | A0A3D5NFD8 |
| Firmicutes | Clostridia | <i>R. bacterium</i>                                              | A0A3D4L3G8 | A0A3D4L3G7 | A0A3D4L584                | A0A3D4L3W7 | A0A3D4L4G8 |
| Firmicutes | Clostridia | <i>R. bacterium</i>                                              | A0A3D1HDR8 | A0A3D1HEB7 | A0A3D1HDM9                | A0A3D1HDY4 | A0A3D1HDZ6 |
| Firmicutes | Clostridia | <i>R. bromii</i>                                                 | A0A414E3C8 | A0A374NG71 | A0A414E3D0                | A0A414E3C5 | A0A414E3D1 |
| Firmicutes | Clostridia | <i>R. bromii</i>                                                 | A0A2N0UPM2 | A0A2N0UPJ7 | A0A2N0UPR2                | A0A2N0UPN0 | A0A2N0UPK9 |
| Firmicutes | Clostridia | <i>R. bromii</i>                                                 | A0A1G5GLT1 | A0A1G5GMB3 | A0A1G5GLV9                | A0A1G5GLG7 | A0A1G5GMB9 |
| Firmicutes | Clostridia | <i>R. bromii</i>                                                 | A0A374N5X1 | A0A374NG71 | A0A374NEW5                | A0A374N5Y0 | A0A374NEV0 |
| Firmicutes | Clostridia | <i>R. bromii</i>                                                 | A0A2N0UI48 | A0A2N0UHZ5 | A0A2N0UHZ0                | A0A2N0UI01 | A0A2N0UI03 |
| Firmicutes | Clostridia | <i>R. bromii</i>                                                 | A0A412DXP0 | A0A412DXL5 | A0A374NEW5                | A0A412DXM2 | A0A412DXJ0 |
| Firmicutes | Clostridia | <i>R. champanellensis</i> (DSM 18848/JCM 17042/KCTC 15320/18P13) | D4L9N2     | D4L9N1     | D4L9N6                    | D4L9N4     | D4L9N7     |
| Firmicutes | Clostridia | <i>R. sp.</i> 37_24                                              | A0A1Q6T9Z2 | A0A1Q6T9Q2 | A0A1Q6T9S6                | A0A1Q6T9V0 | A0A1Q6T9U6 |
| Firmicutes | Clostridia | <i>R. sp.</i> AM36-18                                            | A0A374DJM7 | A0A374DL85 | A0A374DJ85                | A0A374DJ30 | A0A374DLF3 |
| Firmicutes | Clostridia | <i>S. termitidis</i> DSM 10068                                   | A0A1M5YLG7 | A0A1M5YK70 | A0A1M5YK25                | A0A1M5YKA7 | A0A1M5YK03 |
| Firmicutes | Clostridia | <i>S. glycolicus</i> (DSM 8271/FIGlyR)                           | F0SVX7     | F0SVX6     | F0SVX4,<br>F0SVX5         | F0SVX2     | F0SVX3     |

|                |                          |                                                      |            |            |            |            |            |
|----------------|--------------------------|------------------------------------------------------|------------|------------|------------|------------|------------|
| Firmicutes     | Clostridia               | uncultured <i>Ruminococcus sp.</i>                   | A0A1C6B525 | A0A1C6B4W3 | A0A1C6B550 | A0A1C6B4Z7 | A0A1C6B537 |
| Firmicutes     | Negativicutes            | <i>P. arboris</i>                                    | A0A1H7BDT3 | A0A1H7B4U3 | A0A1H7B3V3 | A0A1H7BE09 | A0A1H7B521 |
| Proteobacteria | Gamma<br>-proteobacteria | <i>V. aerogenes</i> CECT 7868                        | A0A1M6EU64 | A0A1M6EU47 | A0A1M6EU23 | A0A1M6EUJ0 | A0A1M6ETU1 |
| Spirochaetes   | Spirochaetia             | <i>T. primitia</i> (ATCC<br>BAA-887/DSM 12427/ZAS-2) | F5YM79     | F5YM78     | F5YM80     | F5YM81     | F5YM82     |
| Spirochaetes   | Spirochaetia             | <i>T. sp.</i> CETP13                                 | A0A1L8MYK5 | A0A1L8MYG8 | A0A1L8MYG9 | A0A1L8MYF2 | A0A1L8MYG4 |

## Figure S1

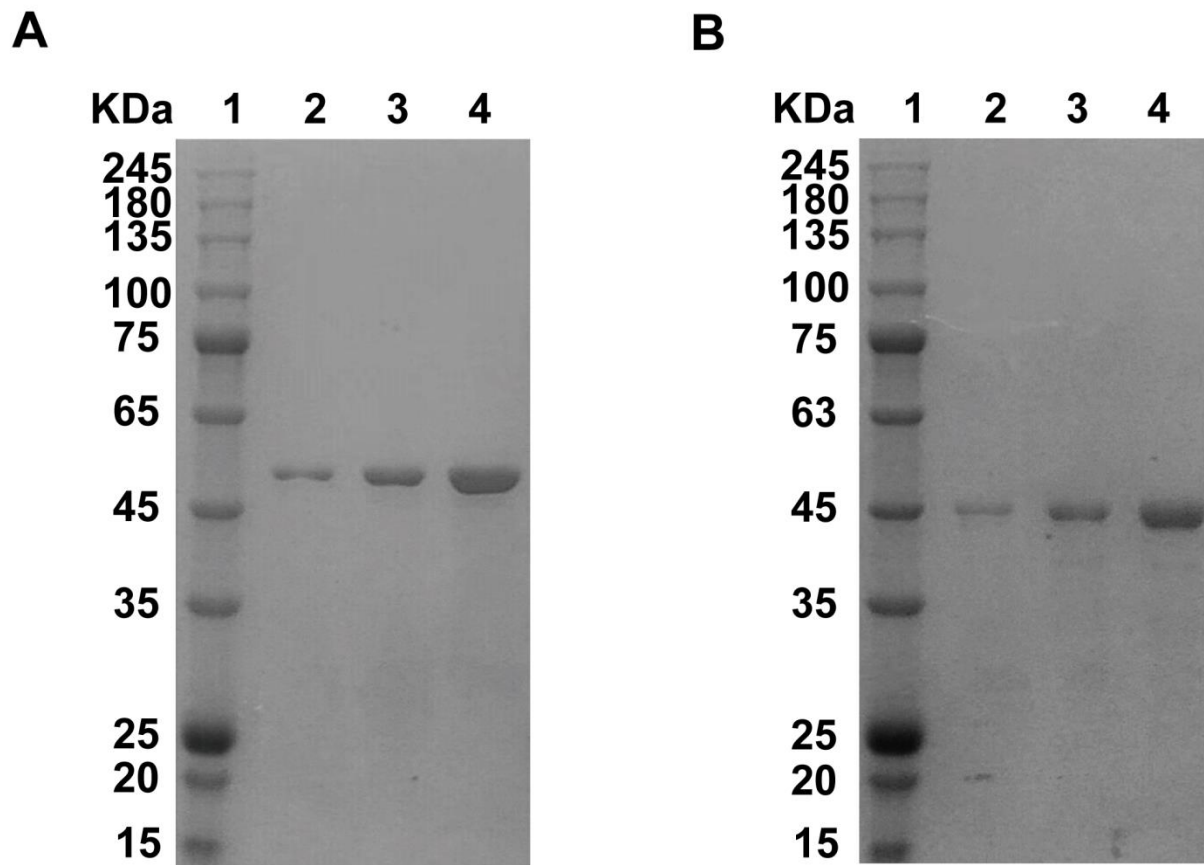

**Fig. S1. SDS-PAGE analyses of purified of PydD and PydE.** A) PydD. B) PydE. Coomassie-stained 10% SDS gel with: lane 1, molecular weight marker; and lanes 2-4, 1, 2, 4  $\mu$ g of PydD and PydE.



**Figure S2**

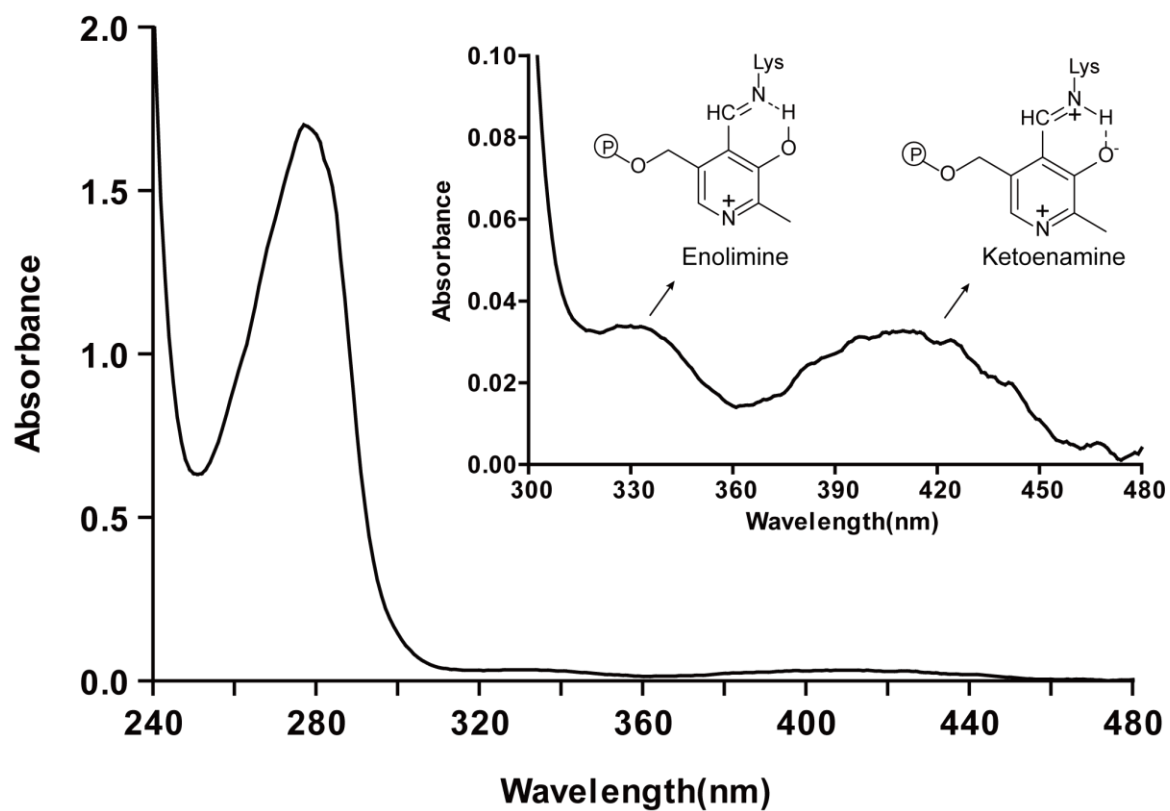

**Fig. S2. UV-Vis absorption spectrum of purified PydD.** The spectrum was acquired for the eluate from TALON column, in buffer containing 20 mM Tris/HCl, pH 7.5, 0.2 M KCl. Inset: enlargement of the 300-480 nm range, showing the absorbance of the sub-stoichiometric PLP cofactor. The two tautomeric forms of the internal aldimine are labeled for the two characteristic peaks.

### Figure S3

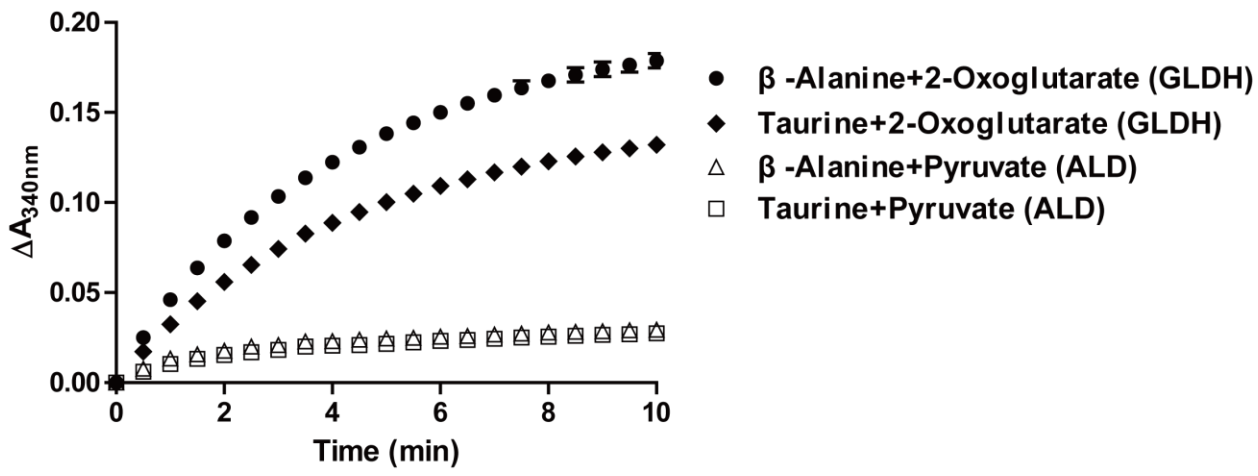

**Fig. S3. Substrate analyses of PydD.** β-alanine/taurine to 2-oxoglutarate/pyruvate transamination by PydD generates L-glutamate/L-alanine, which is detected by assays monitoring NADH formation accompanying L-glutamate/L-alanine oxidation by GLDH/ALD. The error bars represent the standard error of mean.

**Figure S4**

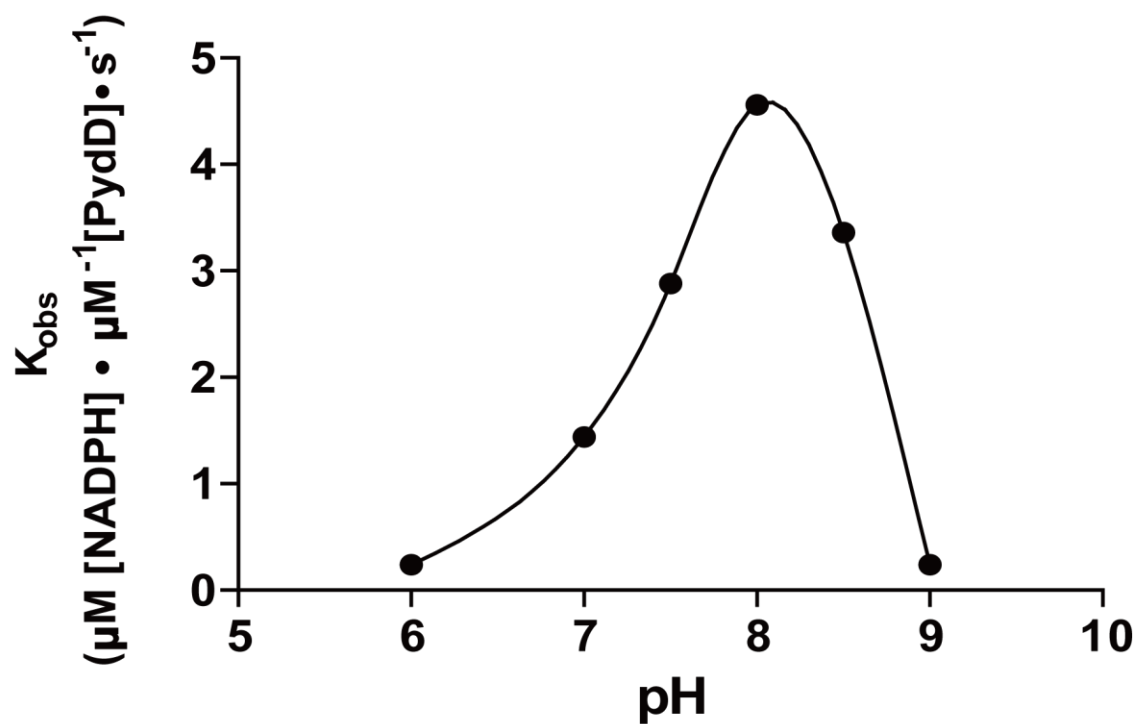

**Fig. S4. Effects of pH on PydD activity of malonic semialdehyde reduction.** PydE-coupled assay was used. In the presence of excess PydE, the decrease of  $A_{340}$  was recorded and used to calculate the activity of PydD under different pH conditions.

## Figure S5

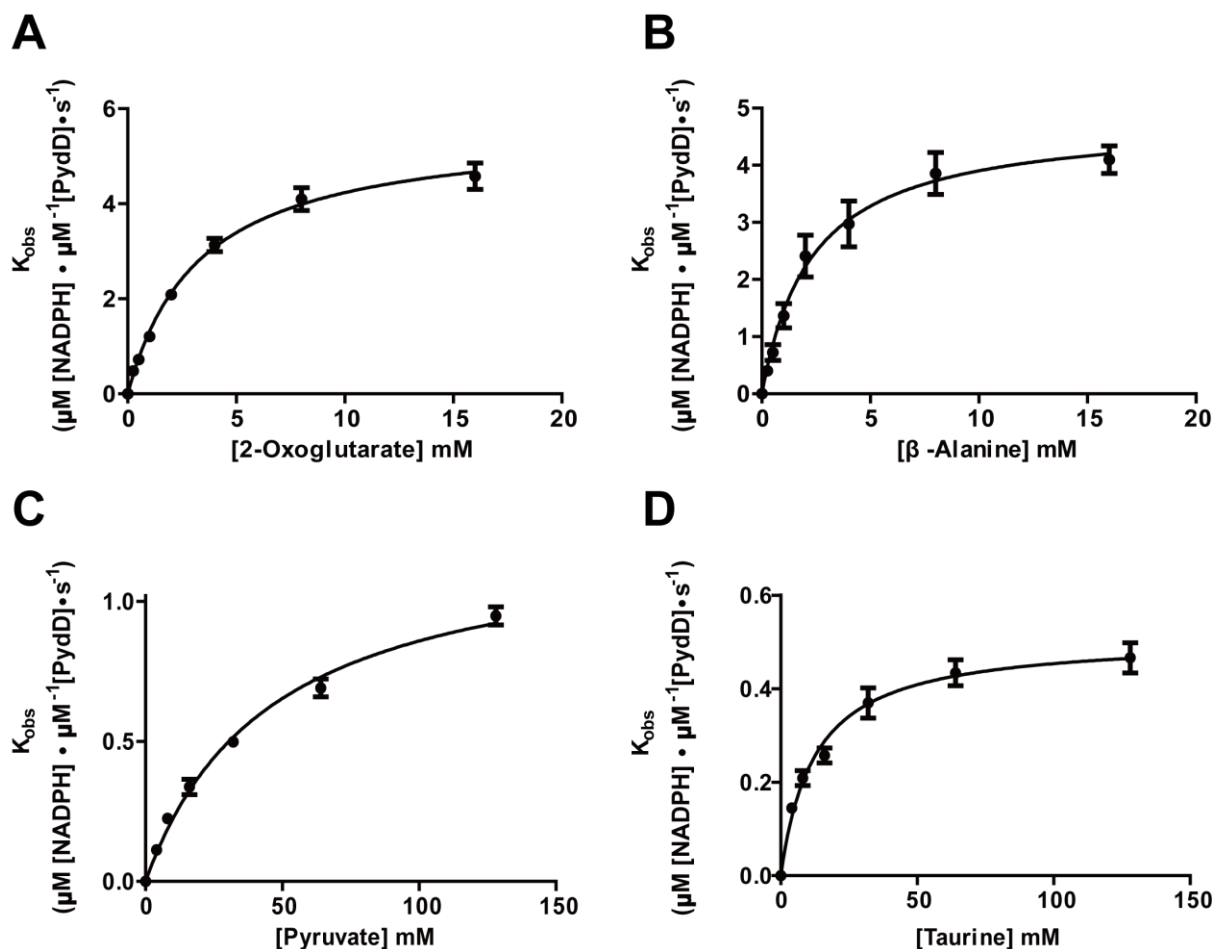

**Fig. S5. Michaelis-Menten kinetics of PydD.** A) Kinetic assays varying the concentration of the amine acceptor 2-oxoglutarate with a fixed concentration of 25 mM  $\beta$ -alanine. 0.1  $\mu\text{M}$  PydD was used. B) Kinetic assays varying the concentration of  $\beta$ -alanine with a fixed concentration of 25 mM 2-oxoglutarate. 0.1  $\mu\text{M}$  PydD was used. C) Kinetic assays varying the concentration of the amine acceptor pyruvate with a fixed concentration of 25 mM  $\beta$ -alanine. 0.5  $\mu\text{M}$  PydD was used. D) Kinetic assays varying the concentration of taurine with a fixed concentration of 25 mM 2-oxoglutarate. 0.5  $\mu\text{M}$  PydD was used. All assays were performed with the excess of PydE monitoring the decrease of  $A_{340}$  representing the consumption of NADPH. The error bars represent the standard error of mean.

Figure S6

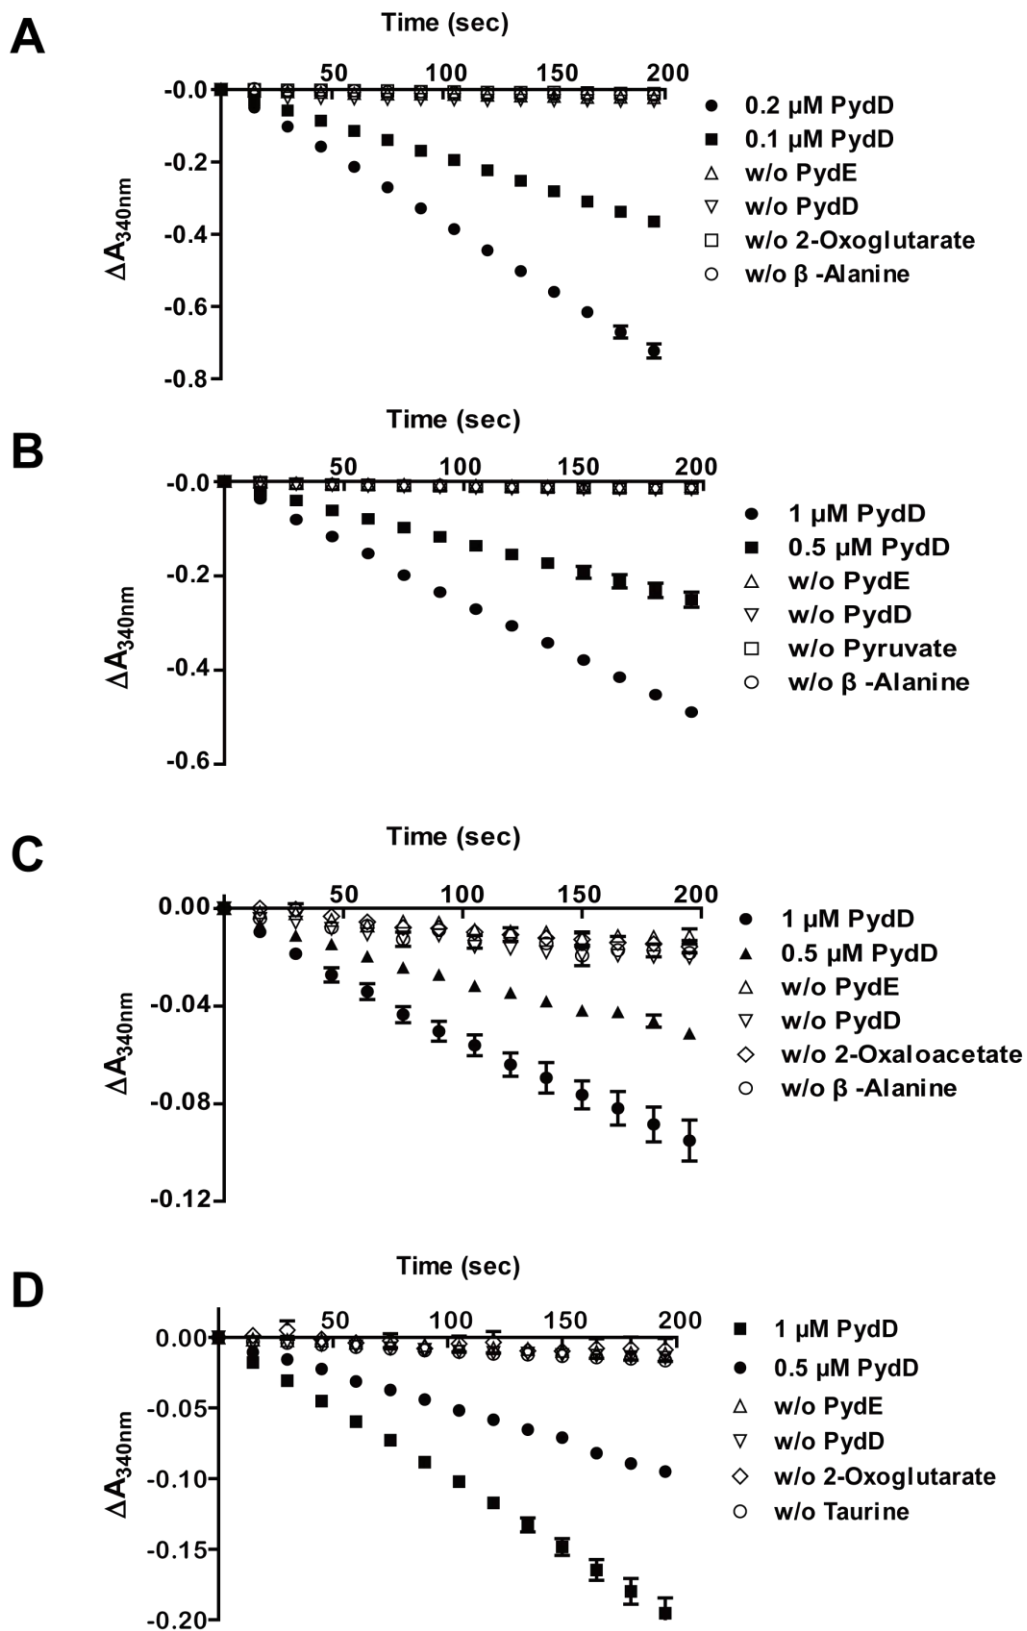

**Fig. S6. Dose-dependent PydD activities on different substrates.** A)  $\beta$ -alanine and 2-oxoglutarate. B)  $\beta$ -alanine and pyruvate. C)  $\beta$ -alanine and oxaloacetate. D) taurine and 2-oxoglutarate. All assays were performed with the excess of PydE monitoring the decrease of  $A_{340}$  representing the consumption of NADPH. The amounts of PydD used in the assay were as indicated. The error bars represent the standard error of mean.

**Figure S7**

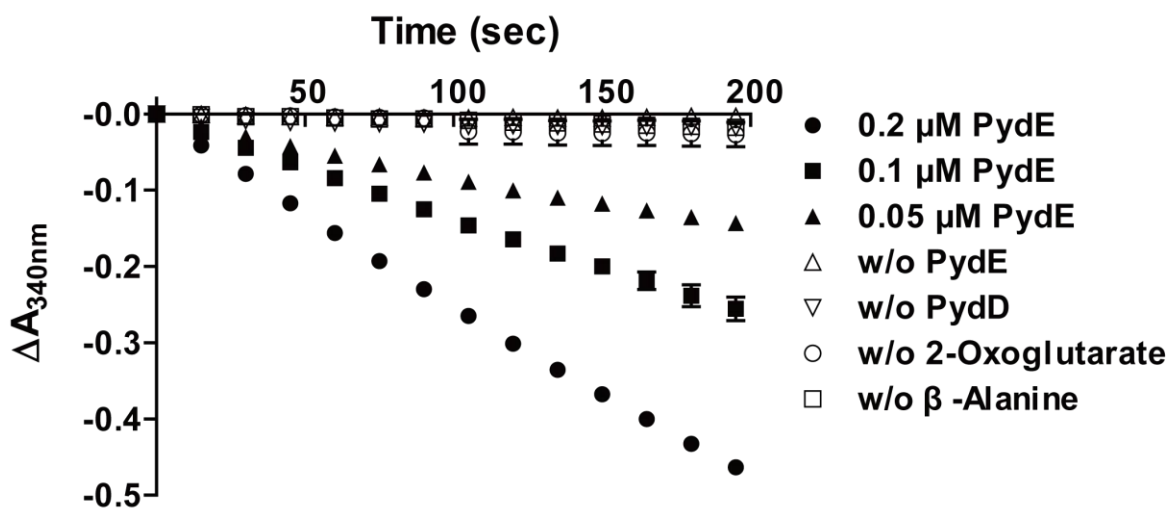

**Fig. S7. PydE activity assays.** 0.05, 0.1 and 0.2  $\mu\text{M}$  PydE were assayed for activity with 10  $\mu\text{M}$  PydD and 25 mM 2-oxoglutarate and  $\beta$ -alanine. The error bars represent the standard error of mean.

**Figure S8**

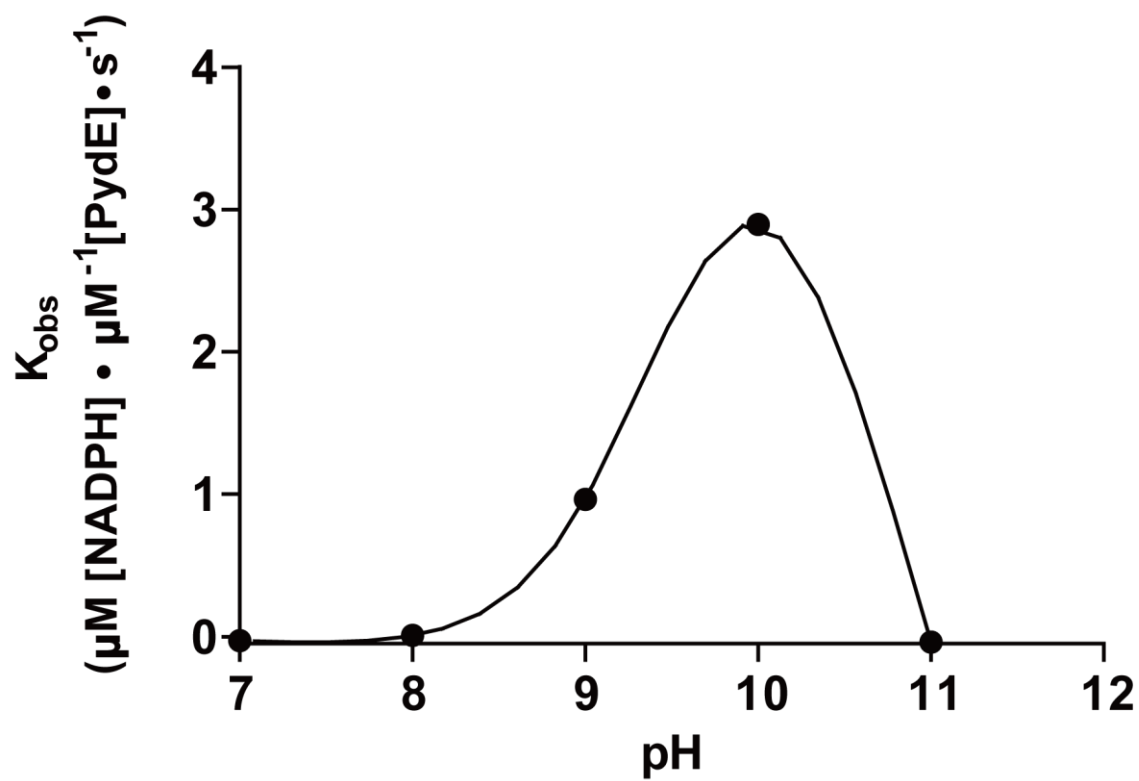

**Fig. S8. Effects of pH on PydE activity of 3-HP oxidation.** The increase of  $A_{340}$  was recorded and used to calculate the activity of PydE under different pH conditions.



**Figure S9**

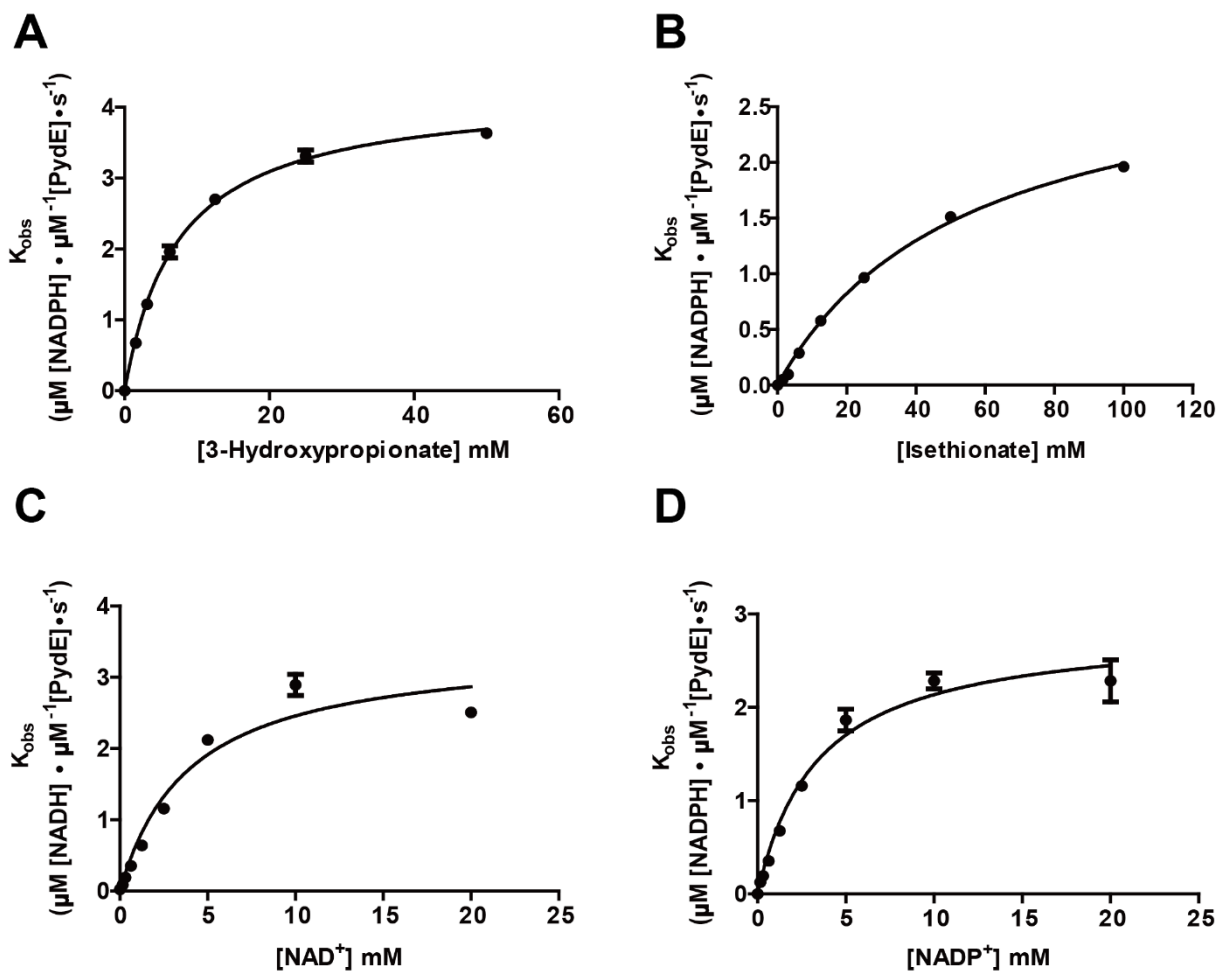

**Fig. S9. Michaelis-Menten kinetics of PydE.** A) Kinetic assays varying the concentration of 3-HP with a fixed concentration of 15 mM  $\text{NADP}^+$ . B) Kinetic assays varying the concentration of isethionate with a fixed concentration of 15 mM  $\text{NADP}^+$ . C) Kinetic assays varying the concentration of  $\text{NAD}^+$  with a fixed concentration of 50 mM 3-HP. D) Kinetic assays varying the concentration of  $\text{NADP}^+$  with a fixed concentration of 50 mM 3-HP. 0.25  $\mu\text{M}$  PydE was used for all assays. The error bars represent the standard error of mean.

**Figure S10**

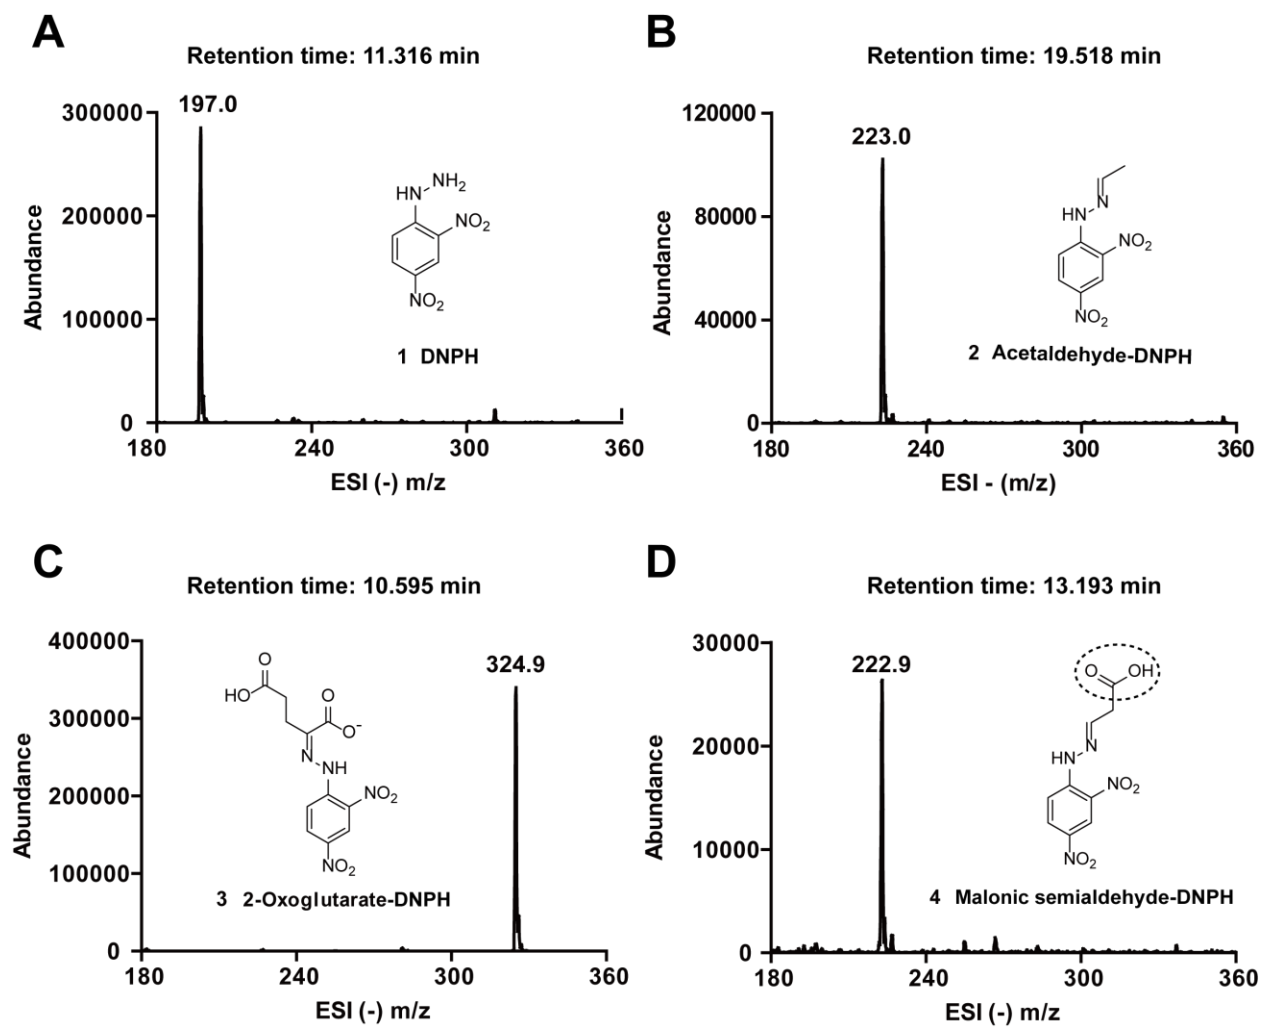

**Fig. S10 ESI (-) m/z spectra of the DNPH derivative peaks in Figure 4A. A) Compound 1. B) Compound 2. C) Compound 3. D) Compound 4.**

# Figure S11

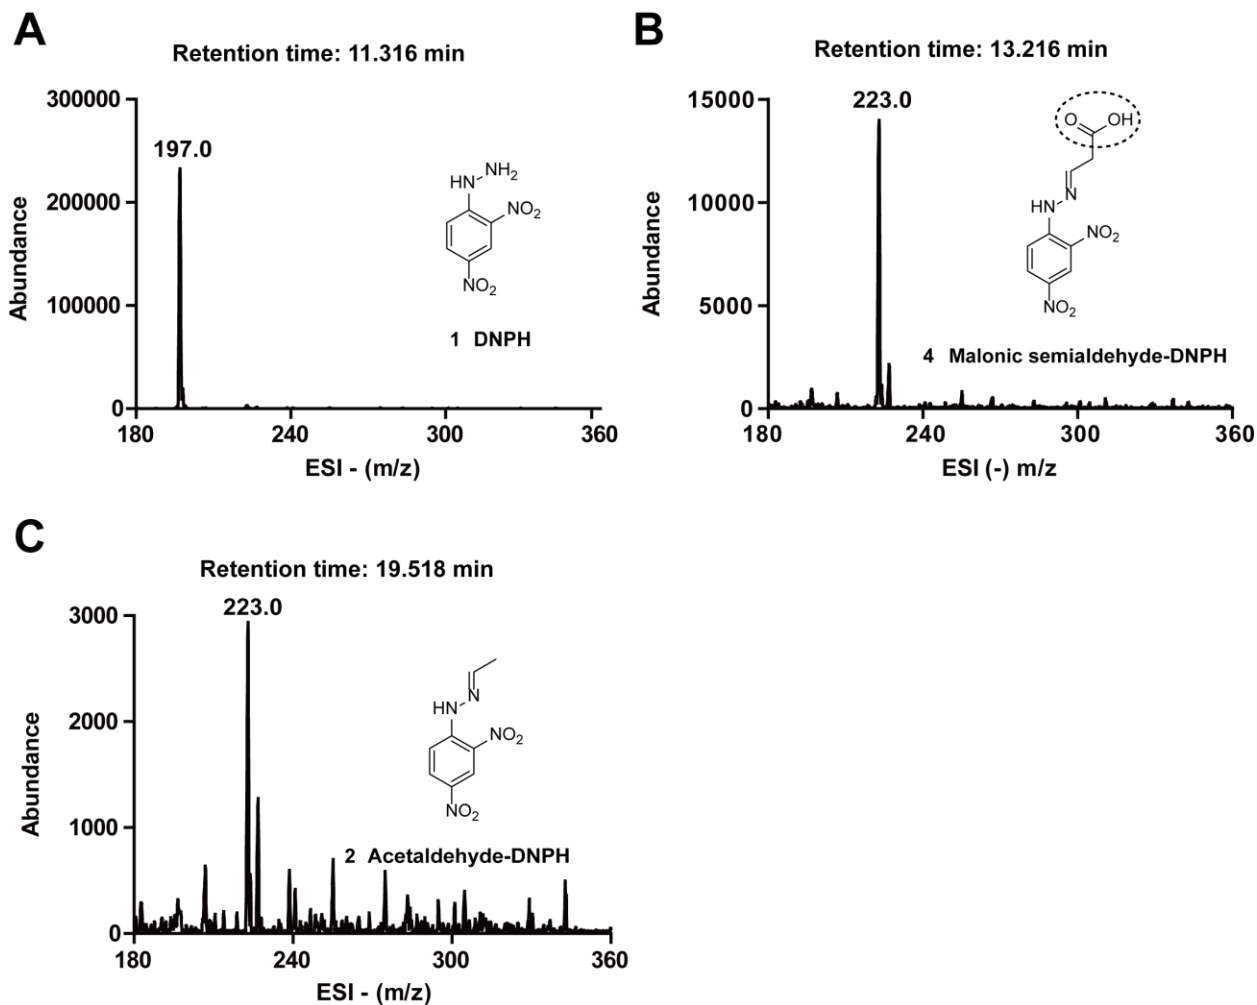

**Fig. S11** ESI (-) m/z spectra of the DNPH derivative peaks in Figure 4B. A) Compound 1. B) Compound 4. C) Compound 2.
